# Supplementary material for: Effects of Interleukin-1β in Glycinergic Transmission at the Central Amygdala
Source: PubMed Central journal article supplement (PMC7973117; doi:10.3389/fphar.2021.613105), 2021-03-05
Supplement: datasheet1.pdf [file datasheet1.pdf]

## Appendix 1

Table 1. Summary results from ClusPro2.0

| Cluster | Members | Weighted Score (kcal/mol) |
|---------|---------|---------------------------|
| 0       | 128     | -199,1                    |
| 1       | 191     | -213,5                    |
| 2       | 110     | -209,8                    |
| 3       | 21      | -215,6                    |
| 4       | 37      | -225,8                    |
| 5       | 22      | -224,2                    |
| 6       | 22      | -207                      |
| 7       | 21      | -196,4                    |
| 8       | 20      | -211,5                    |
| 9       | 12      | -206,5                    |
| 10      | 12      | -203,8                    |
| 11      | 10      | -208,6                    |
| 12      | 10      | -203,2                    |
| 13      | 10      | -196,1                    |
